# Supplementary material
Source: Springer Nature journal article supplement (https://www.springermedizin.de/resource/supplementary/12881_2008_434_MOESM2_ESM.pdf/9450646)

# Empirical differentiaton distribution of CEU vs YRI on chromosome 19

95% quantile

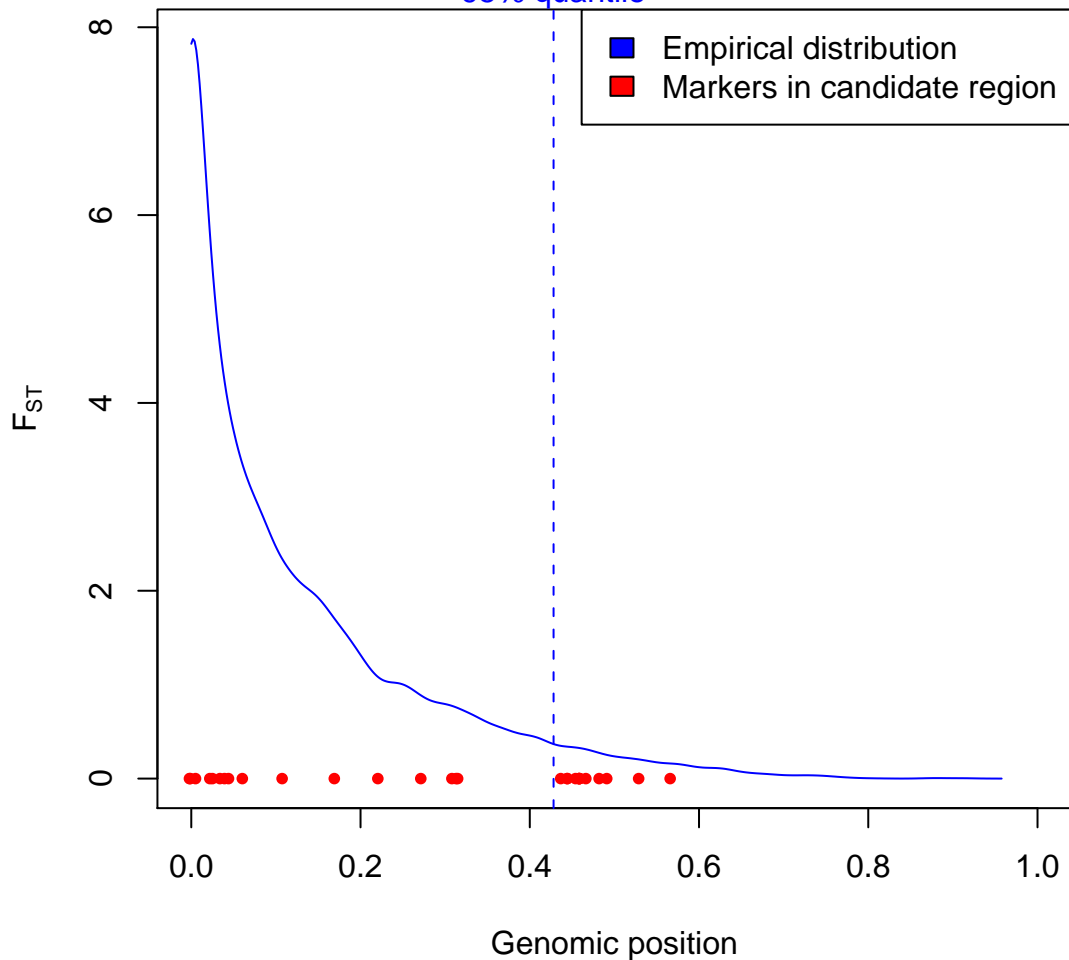

Supplement: MOESM2 [file 9450646]
